# Supplementary material for: Theoretical and experimental investigation on structural, electronic and magnetic properties of layered Mn5O8
Source: Royal Society of Chemistry journal article supplement (doi:10.1039/c6cp04170a), 2016-01-01
Supplement: c6cp04170a1.pdf [file c6cp04170a1.pdf]

# Theoretical and experimental investigation on structural, electronic and magnetic properties of layered $\text{Mn}_5\text{O}_8$

M. R. Ashwin Kishore,<sup>1</sup> H. Okamoto,<sup>2</sup> Lokanath Patra,<sup>1</sup>  
R. Vidya,<sup>3</sup> Anja O. Sjøstad,<sup>2</sup> H. Fjellvåg,<sup>2</sup> and P. Ravindran<sup>1,2,\*</sup>

<sup>1</sup>Department of Physics, Central University of Tamil Nadu,  
Thiruvarur, 610101, India

<sup>2</sup>Center for Materials Science and Nanotechnology and Department of Chemistry,  
University of Oslo, Box 1033 Blindern, N-0315 Oslo, Norway

<sup>3</sup>Department of Medical Physics, Anna University, Chennai, 600025, India

September 1, 2016

## 1 Supplementary Information

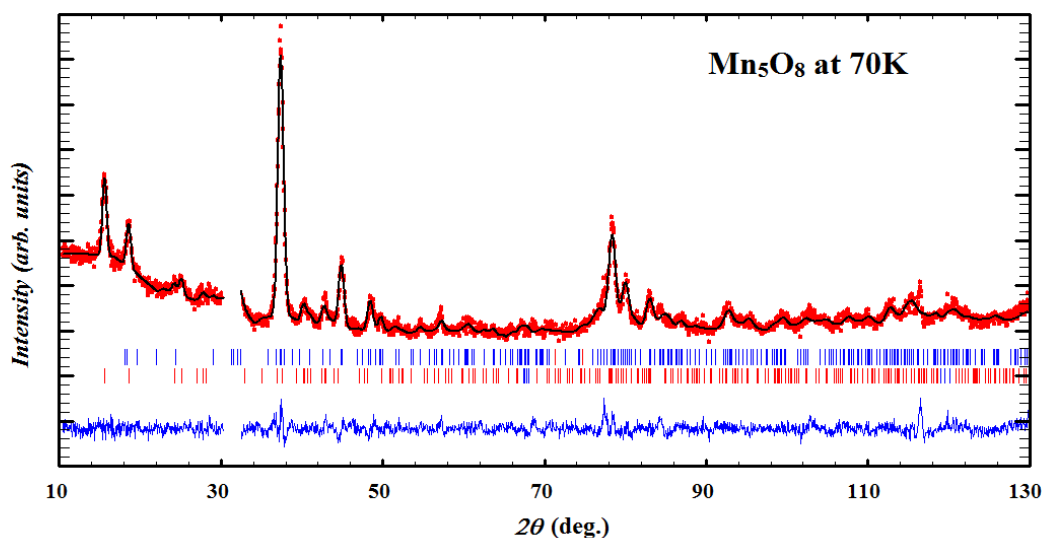

Figure 1: Experimental, calculated, and difference NPD patterns of  $\text{Mn}_5\text{O}_8$  at 70 K. Upper and lower bars denote Bragg positions of nuclei and magnetic reflections respectively. The region  $30.2^\circ$  to  $32.3^\circ$  is excluded owing to background from the detector system.

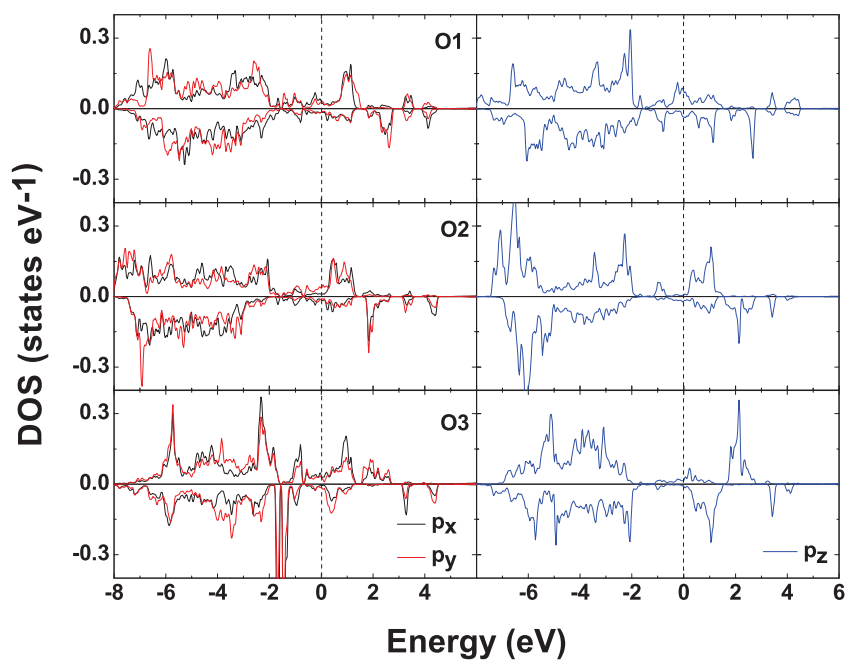

Figure 2: Orbital decomposed DOS for oxygen  $p$  states of  $Mn_5O_8$  in the ground state M4 configuration.

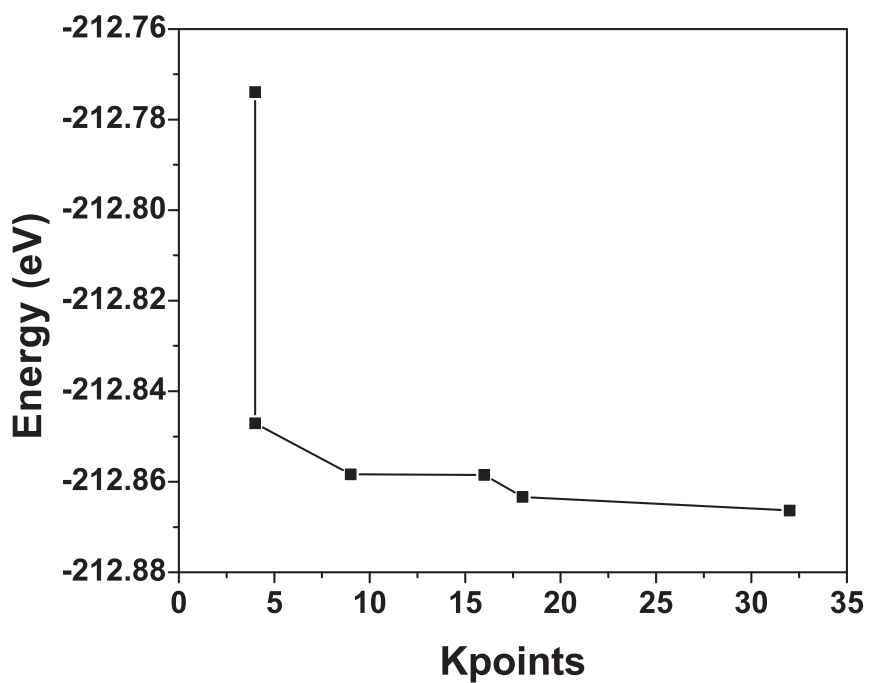

Figure 3: Total energy curve as a function of K-point for  $Mn_5O_8$
